# Supplementary material
Source: Springer Nature journal article supplement (https://www.springerprofessional.de/resource/supplementary/13638_2010_17_MOESM10_ESM.pdf/11897214)

# Packet Delivery Ratio Vs Number of Nodes

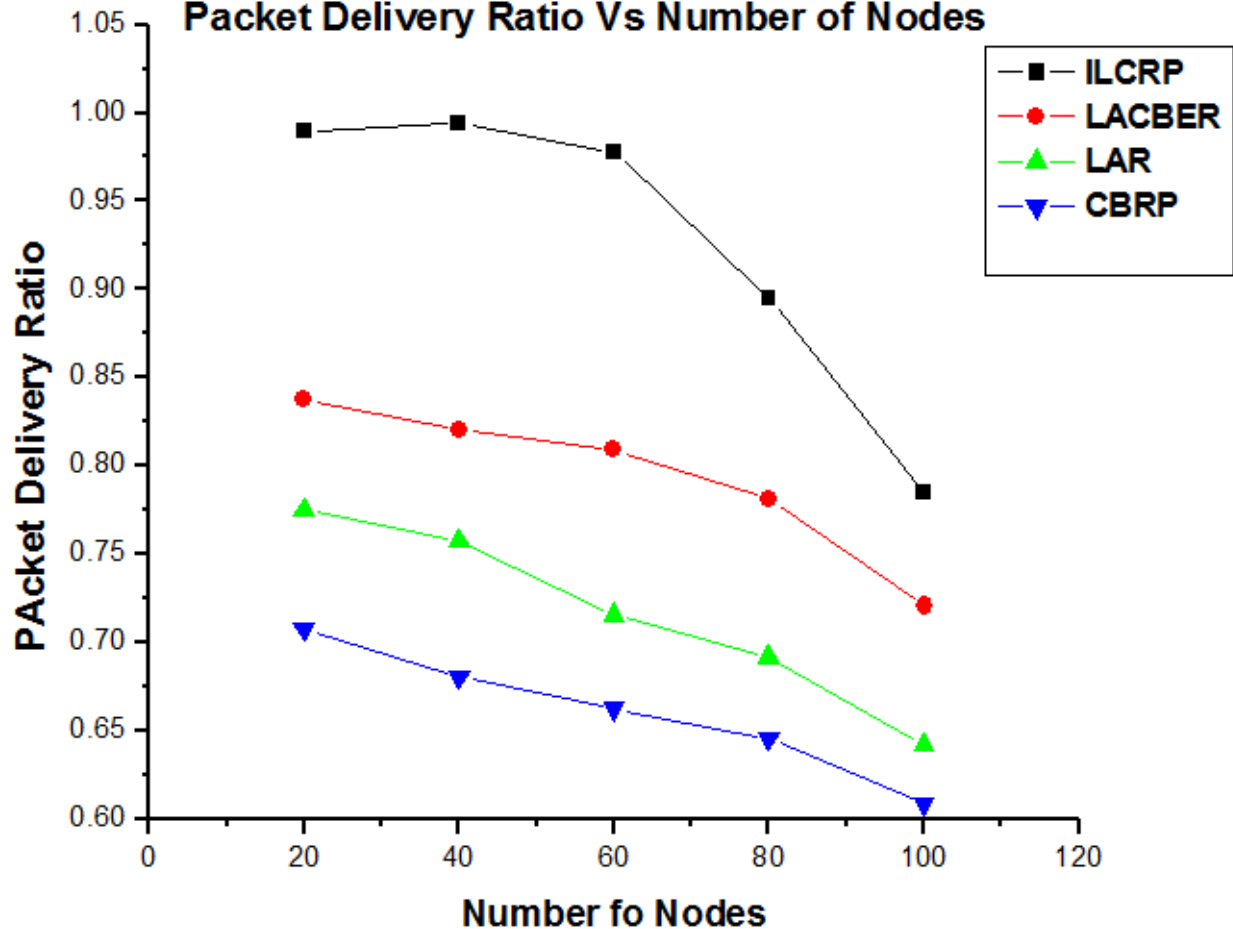

Supplement: MOESM10 [file 11897214]
